# Supplementary material
Source: publisher site journal article supplement (https://www.spandidos-publications.com/1421/downloadSupplementary)
Supplement: Supplementary file 1 [file downloadSupplementary]

Figure S1. Optimal shRNA for SPAG6 was screened via RT-qPCR and western blotting analysis, and revealed as SPAG6-shRNA3. (A) Relative mRNA expression level of SPAG6 was detected via RT-qPCR. Gene expression was normalized to GAPDH in the same sample. Data are presented as the mean  $\pm$  standard deviation of three independent experiments. \*\* $P < 0.01$  vs. NC-shRNA. (B) Relative protein expression levels of SPAG6 were detected using western blot analysis. NC, negative control; shRNA, short hairpin RNA; RT-qPCR, reverse transcription-quantitative PCR; SPAG6, sperm-associated antigen 6; ns, not significant.

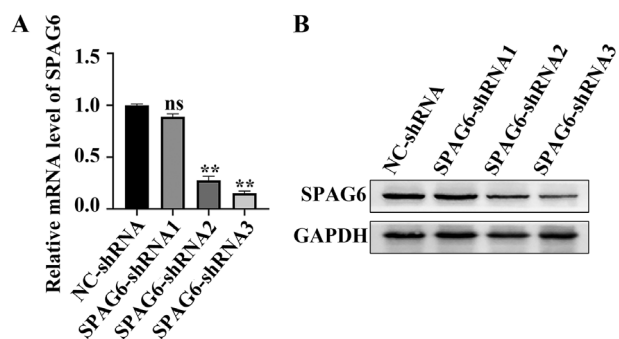

Table SI. Three different target sequences for SPAG6-shhairpin RNA.

| Sequence name                                                | Target sequences for SPAG6 shRNA, 5'→3' | GC, % |
|--------------------------------------------------------------|-----------------------------------------|-------|
| SPAG6-shRNA1                                                 | CATAAAGAATATCCTGCAA                     | 31.58 |
| SPAG6-shRNA2                                                 | AGCTCATTCTGAGAACCTA                     | 42.11 |
| SPAG6-shRNA3                                                 | AAAGCATTCTCCAGAGTTA                     | 36.84 |
| SPAG6, sperm-associated antigen 6; shRNA, short hairpin RNA. |                                         |       |
